# Supplementary material
Source: PubMed Central journal article supplement (PMC4068541)
Supplement: AAC.00056-14_zac007143044so1.pdf [file AAC.00056-14_zac007143044so1.pdf]

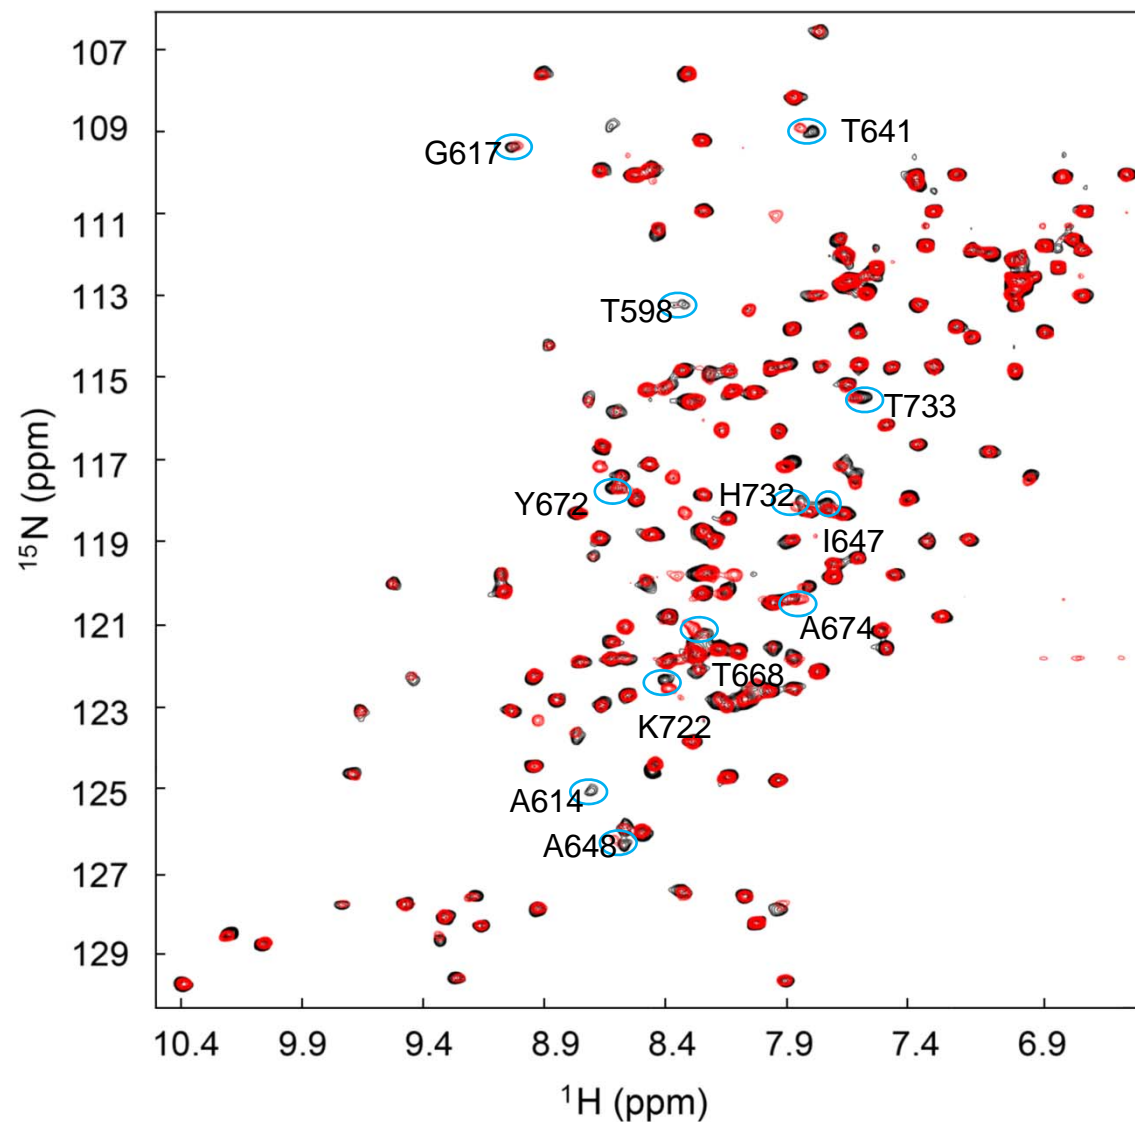

**Figure S1: Interaction of PFV RNase H with inhibitor RDS1643.** (A) Overlay of [ $^1\text{H}$   $^{15}\text{N}$ ] HSQC spectra of 80  $\mu\text{M}$   $^{15}\text{N}$  labeled PFV RNase H in the absence (black) and presence of 3.9 mM RDS1643 (red). Resonances with significant changes of chemical shifts are labeled.
